# Supplementary material for: Escherichia coli Genomic Diversity within Extraintestinal Acute Infections Argues for Adaptive Evolution at Play
Source: PubMed Central journal article supplement (PMC7845604; doi:10.1128/msphere.01176-20), 2021-01-06

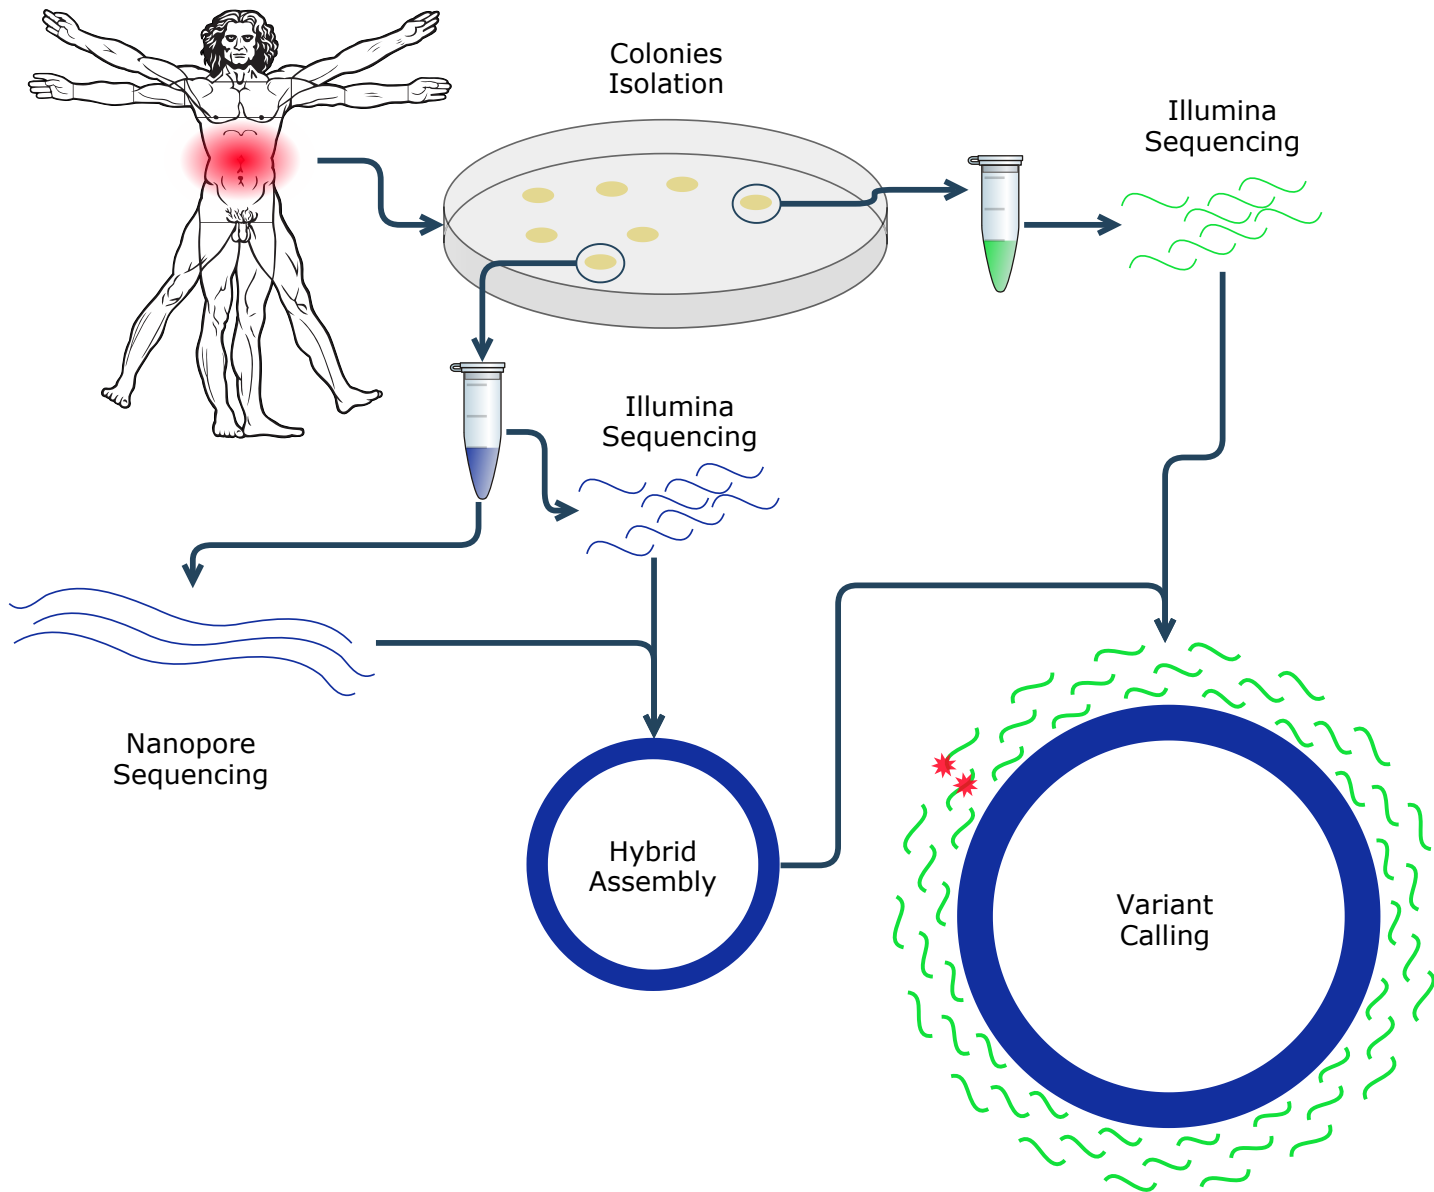

Supplement: mSphere.01176-20-sf001.pdf [file mSphere.01176-20-sf001.pdf]
