# Supplementary material for: Escherichia coli Genomic Diversity within Extraintestinal Acute Infections Argues for Adaptive Evolution at Play
Source: PubMed Central journal article supplement (PMC7845604; doi:10.1128/msphere.01176-20), 2021-01-06

**A**

Patient 17 isolate 5-35:

*rpoS*<sub>WT</sub>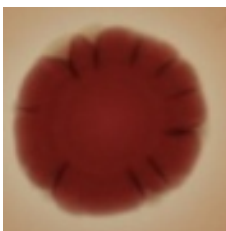*rpoS*<sub>D118Y</sub>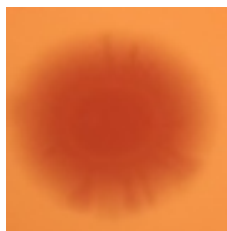 $\Delta$ *rpoS*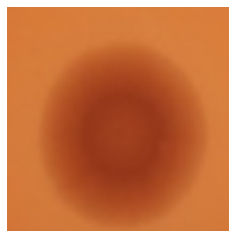**B**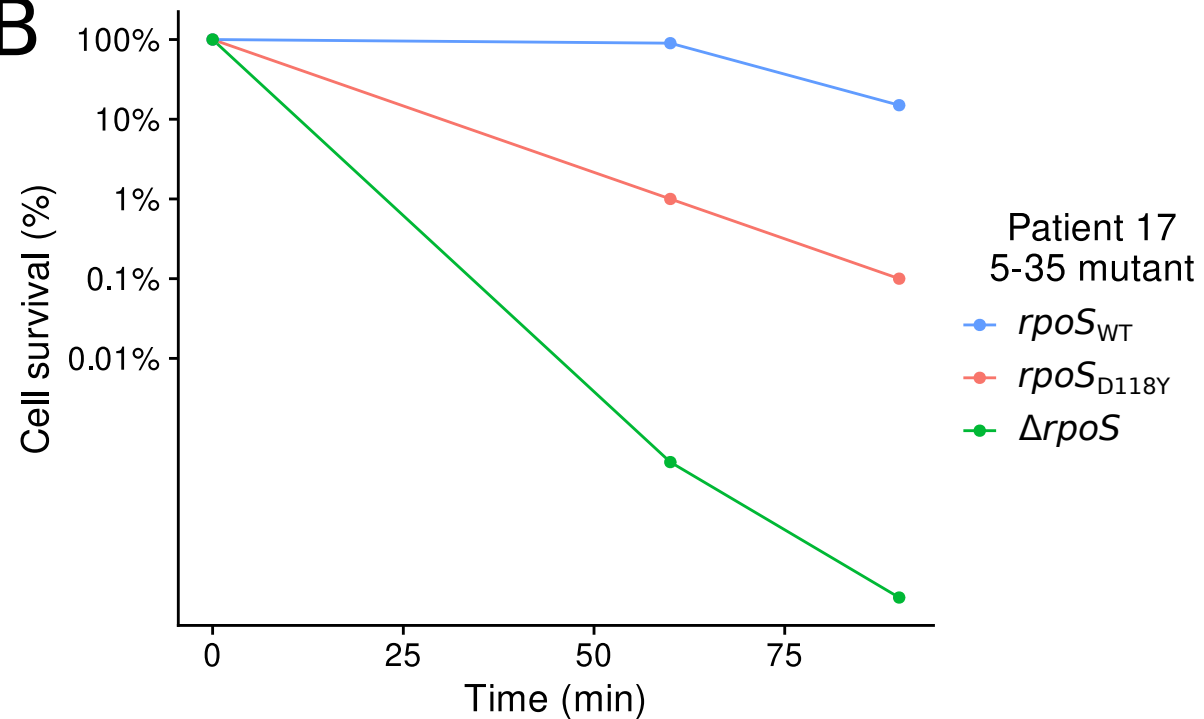

Supplement: mSphere.01176-20-sf002.pdf [file mSphere.01176-20-sf002.pdf]
