# Supplementary material for: Escherichia coli Genomic Diversity within Extraintestinal Acute Infections Argues for Adaptive Evolution at Play
Source: PubMed Central journal article supplement (PMC7845604; doi:10.1128/msphere.01176-20), 2021-01-06

**A**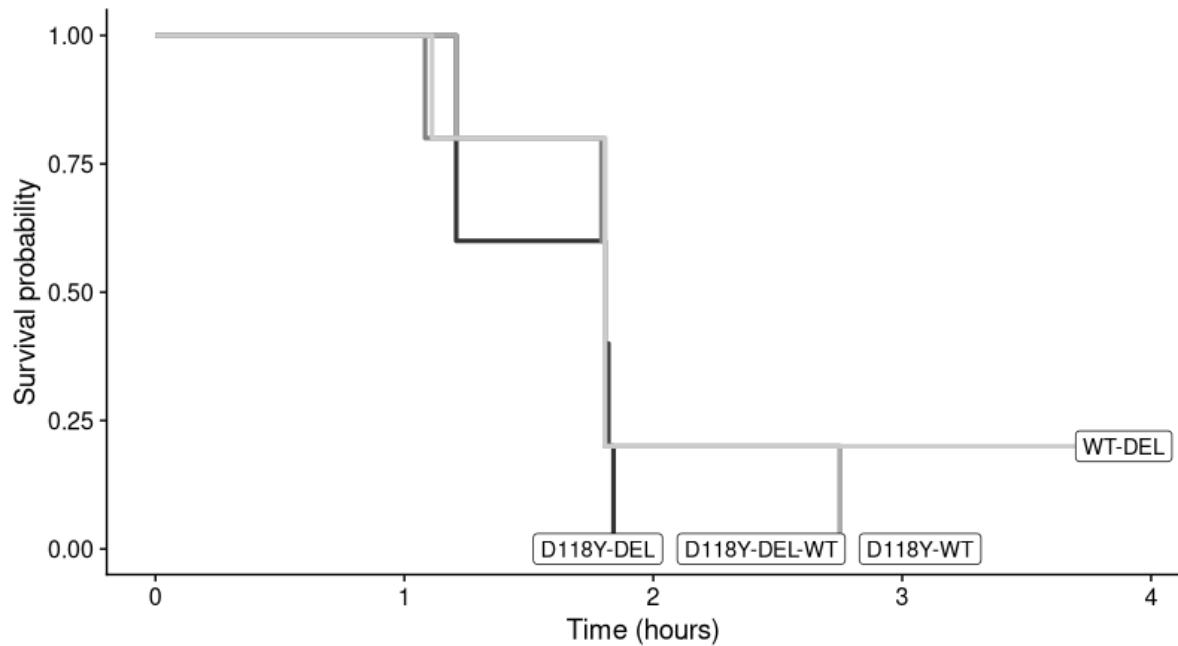**B**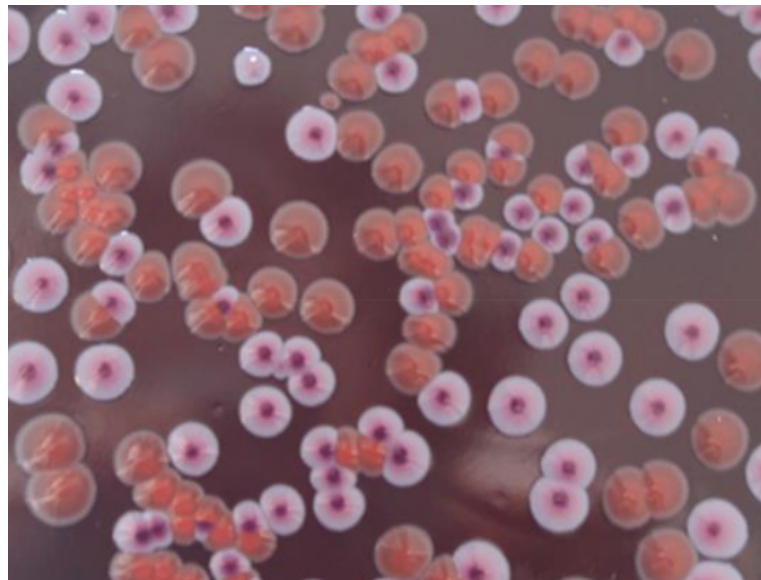

Supplement: mSphere.01176-20-sf003.pdf [file mSphere.01176-20-sf003.pdf]
